# Supplementary material for: Amorphous carbon modification on implant surface: a general strategy to enhance osteogenic differentiation for diverse biomaterials via FAK/ERK1/2 signaling pathways
Source: Royal Society of Chemistry journal article supplement (doi:10.1039/c8tb02850h), 2019-01-01
Supplement: c8tb02850h1.pdf [file c8tb02850h1.pdf]

## Supplementary information

### Amorphous carbon-modification on implant surface: a general strategy to enhance osteogenic differentiation for diverse biomaterials via FAK/ERK1/2 signaling pathways

Xinran Zhang,<sup>‡ab</sup> Haotian Li,<sup>‡c</sup> Jiaqiang Liu,<sup>‡a</sup> Hui Wang,<sup>b</sup> Wenjun Sun,<sup>b</sup> Kaili Lin,<sup>\*a</sup> Xudong Wang,<sup>\*a</sup> Steve Guofang Shen,<sup>\*a</sup>

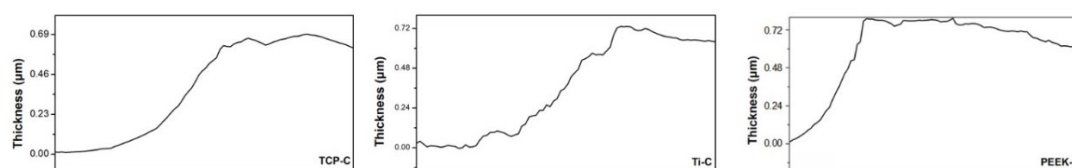

Fig. S1 The thickness of carbon-coating measured by AFM.

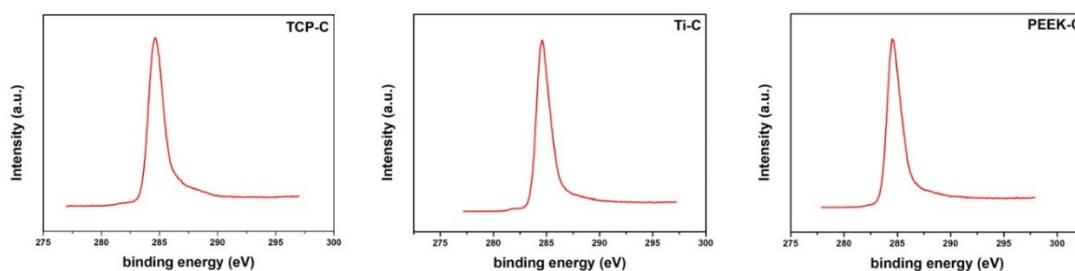

Fig. S2 XPS spectra of the TCP-C, Ti-C and PEEK-C samples.

<sup>a</sup> Department of Oral and Cranio-maxillofacial Science, Shanghai Ninth People's Hospital, College of Stomatology, Shanghai Jiao Tong University School of Medicine; National Clinical Research Center for Oral Diseases; Shanghai Key Laboratory of Stomatology & Shanghai Research Institute of Stomatology, Shanghai 200011, China.

<sup>b</sup> School & Hospital of Stomatology, Tongji University, Shanghai Engineering Research Center of Tooth Restoration and Regeneration, Shanghai 200072, China.

<sup>c</sup> Department of Spine Surgery, Tongji Hospital, Tongji University School of Medicine, Shanghai 200065, China.

<sup>‡</sup>Those authors contributed equally to this study.

\*Corresponding author: Tel:86-21-23272699; Fax: 86-21-63136856.

E-mail: lklecnu@aliyun.com (K. Lin); xudongwang70@hotmail.com (X. Wang); maxillofac Surg@163.com (S. Shen).
